# Supplementary material
Source: Springer Nature journal article supplement (https://www.springermedizin.de/resource/supplementary/13618_2013_84_MOESM3_ESM.pdf/9681124)

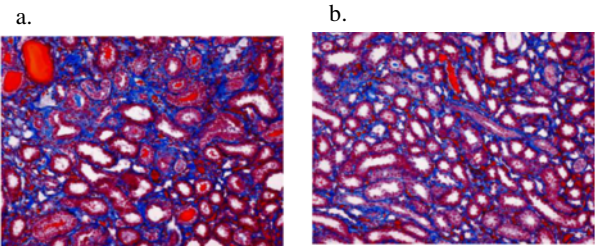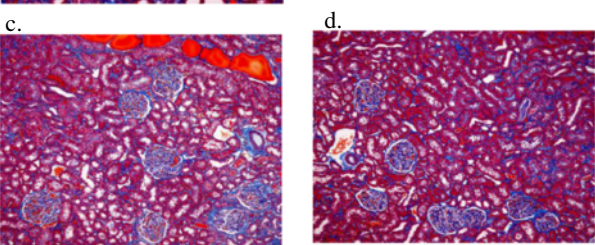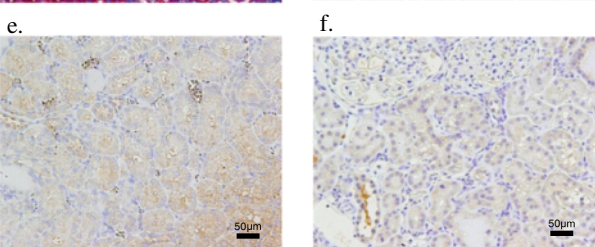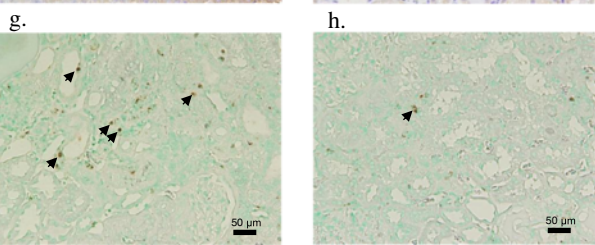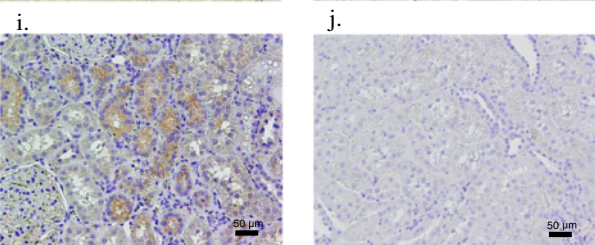

**A**

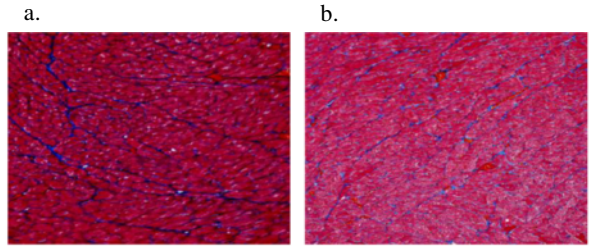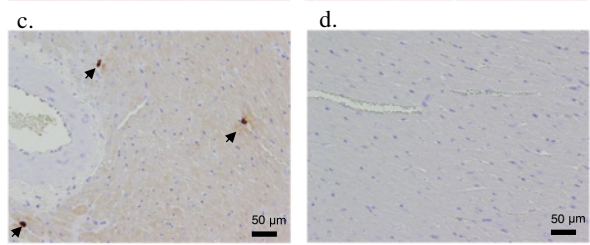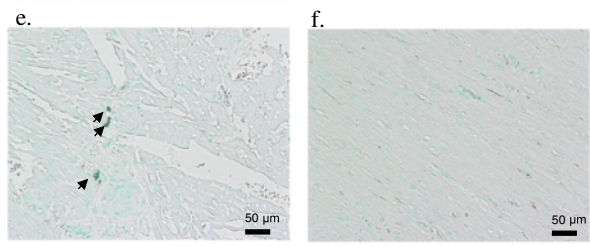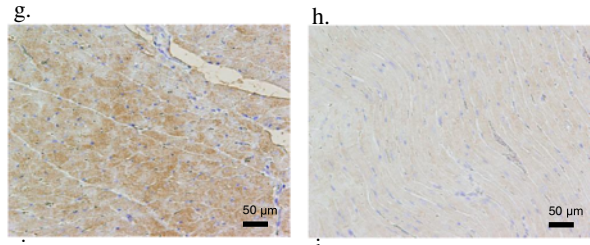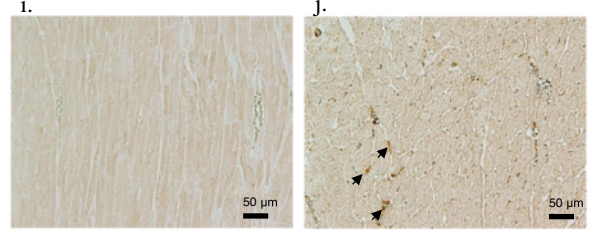

**B**

Supplement: MOESM3 [file 9681124]
